# Supplementary material for: Regulation of PDGFR-β gene expression by targeting the G-vacancy bearing G-quadruplex in promoter
Source: PubMed Central journal article supplement — Nucleic Acids Res. 2021 Nov 30;49(22):12634–43. doi: 10.1093/nar/gkab1154 (PMC8682790; doi:10.1093/nar/gkab1154), 2021-11-30
Supplement: gkab1154_supplemental_file.pdf [file gkab1154_supplemental_file.pdf]

Supporting Information for  
**Regulation of PDGFR- $\beta$  gene expression through targeting G-vacancy-bearing  
G-quadruplex in promoter**

Juan-nan Chen<sup>1#</sup>, Yi-de He<sup>1, 2#</sup>, Hui-ting Liang<sup>1</sup>, Ting-ting Cai<sup>1</sup>, Qi Chen<sup>3</sup>, Ke-wei  
Zheng<sup>1\*</sup>

<sup>1</sup>School of Pharmaceutical Sciences (Shenzhen), Sun Yat-Sen University, Guangzhou  
510006, P.R. China

<sup>2</sup>School of Life Sciences, Sun Yat-Sen University, Guangzhou 510275, P.R. China

<sup>3</sup>School of Public Health (Shenzhen), Sun Yat-Sen University, Guangzhou 510006,  
P.R. China

<sup>#</sup>Contributed equally to the work

\*Correspondence should be addressed to Ke-wei Zheng  
([zhengkw6@mail.sysu.edu.cn](mailto:zhengkw6@mail.sysu.edu.cn))

**Supplementary Figures S1-S11, Table S1 and S2**

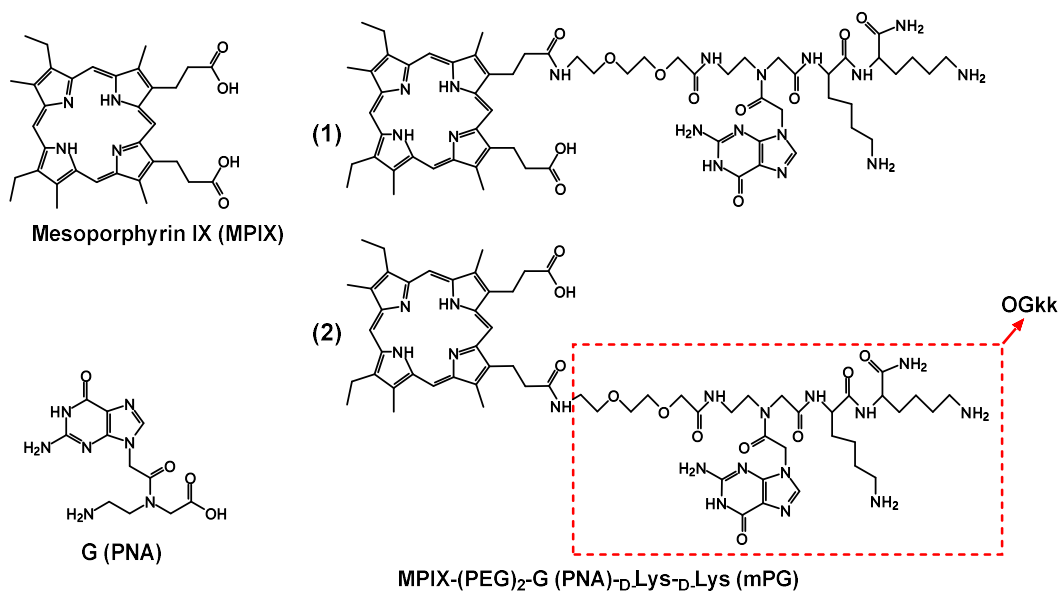

**Figure S1.** Structure of Mesoporphyrin IX (MPIX), guanine peptide nucleic acid (PNA-G), MPIX-(PEG)<sub>2</sub>-G (PNA)-D.Lys-D.Lys (mPG) and OGkk. (1) and (2) are two isomers of mPG.

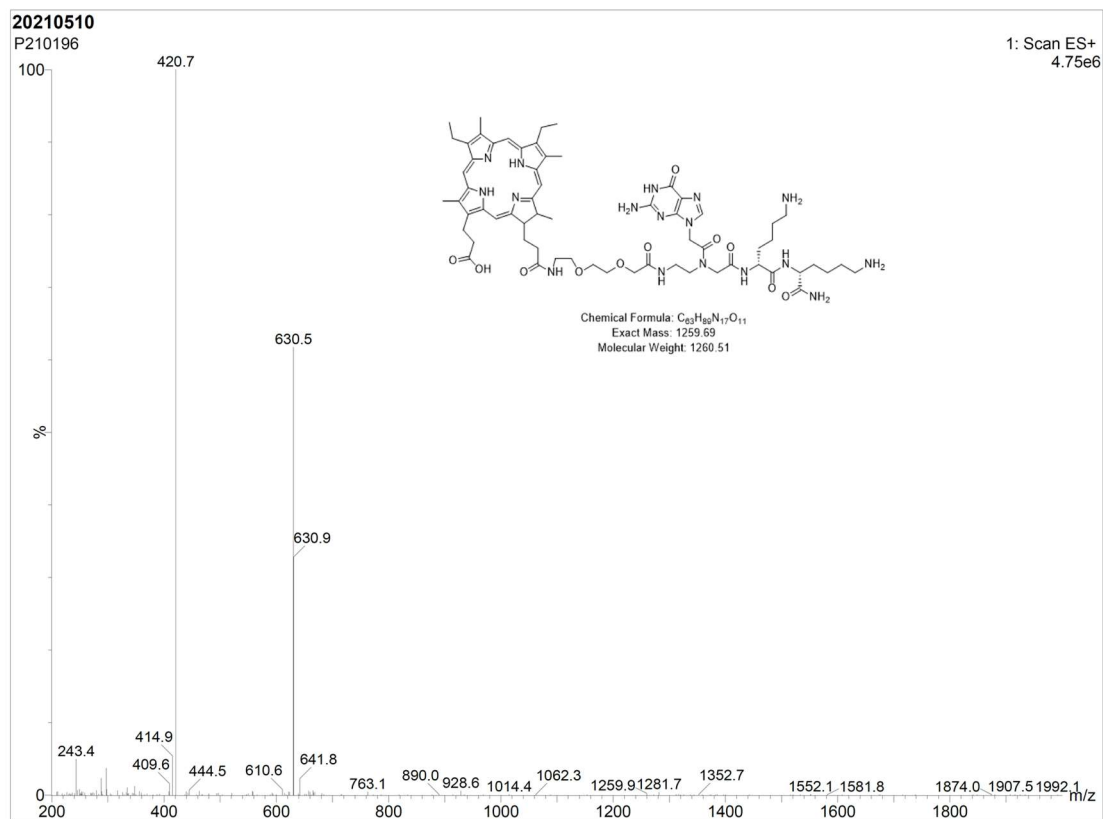

**Figure S2.** ESI mass spectra of mPG.

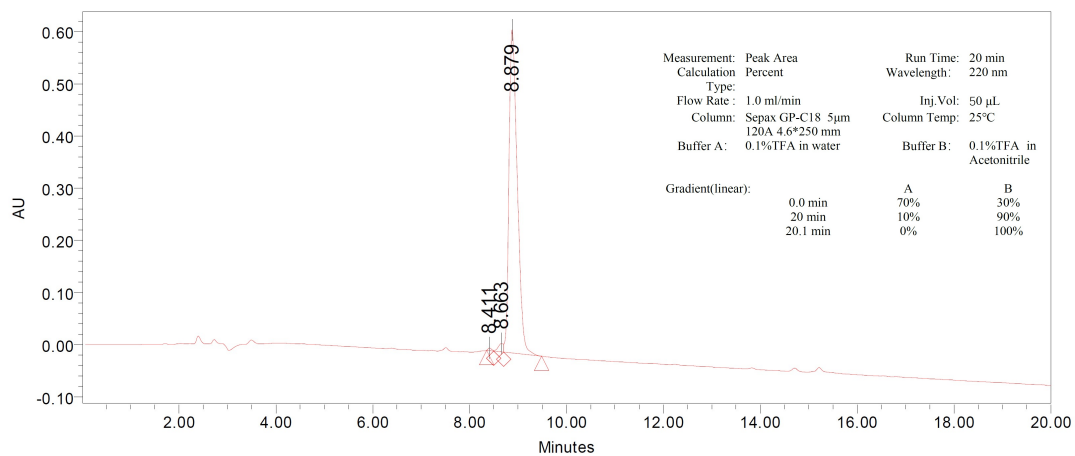

**Figure S3.** HPLC characterization of synthesized mPG.

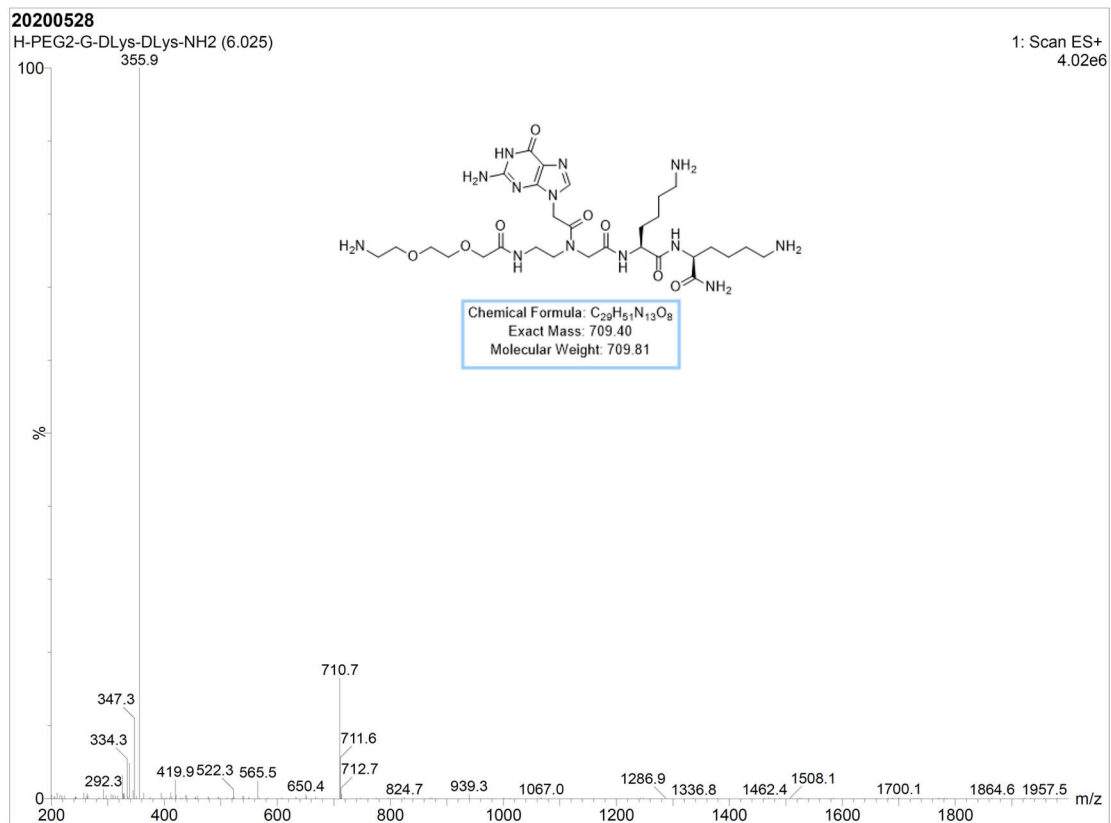

Figure S4. ESI mass spectra of OGkk.

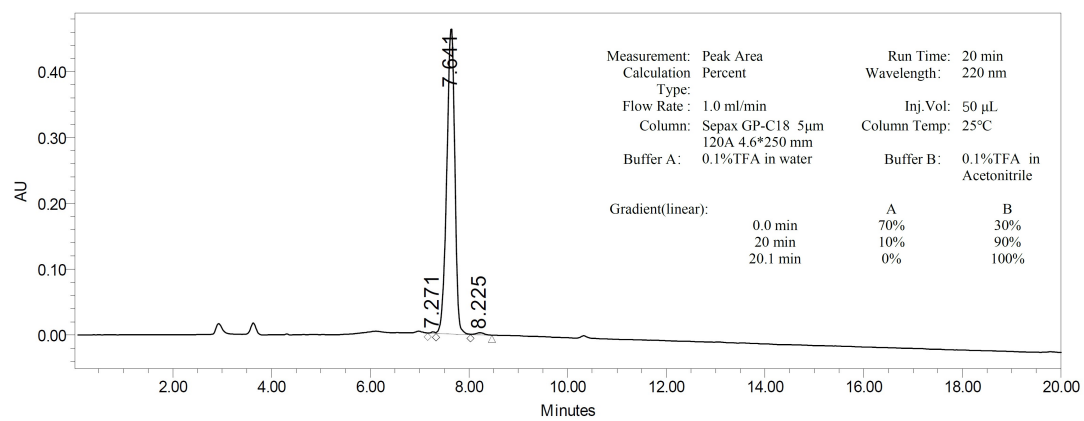

**Figure S5.** HPLC characterization of synthesized OGkk.

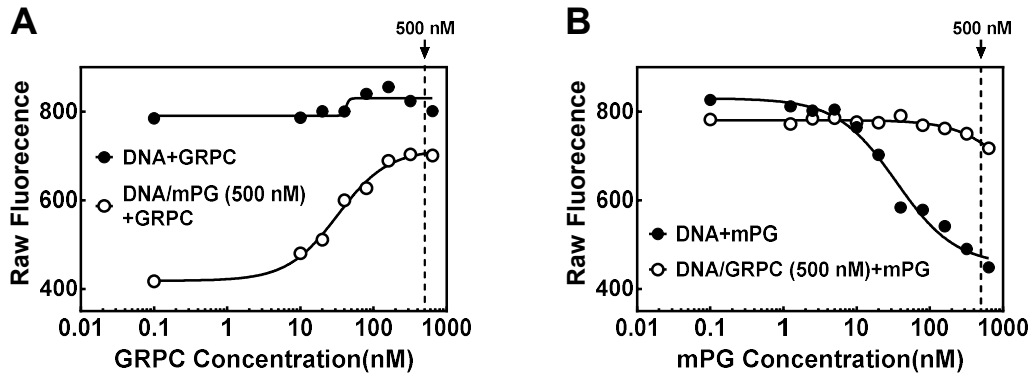

**Figure S6.** Comparison of the binding ability between PDGFR- $\beta$  GVBQ with GRPC and mPG by fluorescence titration. A) 100 nM PDGFR- $\beta$  GVBQ DNA (M2-3-4-T) with or without 500 nM mPG was mixed with GRPC of the indicated concentrations, incubated at room temperature for 2 hours and then subjected to measure the fluorescence. The fluorescence of PDGFR- $\beta$  GVBQ DNA can first be quenched by 500 nM mPG. The competitive binding of GRPC to DNA leads to a reduction in DNA/mPG complex, thereby increasing the fluorescent signal. B) 100 nM PDGFR- $\beta$  GVBQ DNA (M2-3-4-T) with or without 500 nM GRPC was mixed with mPG of the indicated concentrations at room temperature for 2 hours and then subjected to measure the fluorescence. The PDGFR- $\beta$  GVBQ DNA can first be bound by 500 nM GRPC. The competitive binding of mPG to DNA leads to a formation of DNA/mPG complex, thereby decreasing the fluorescent signal.

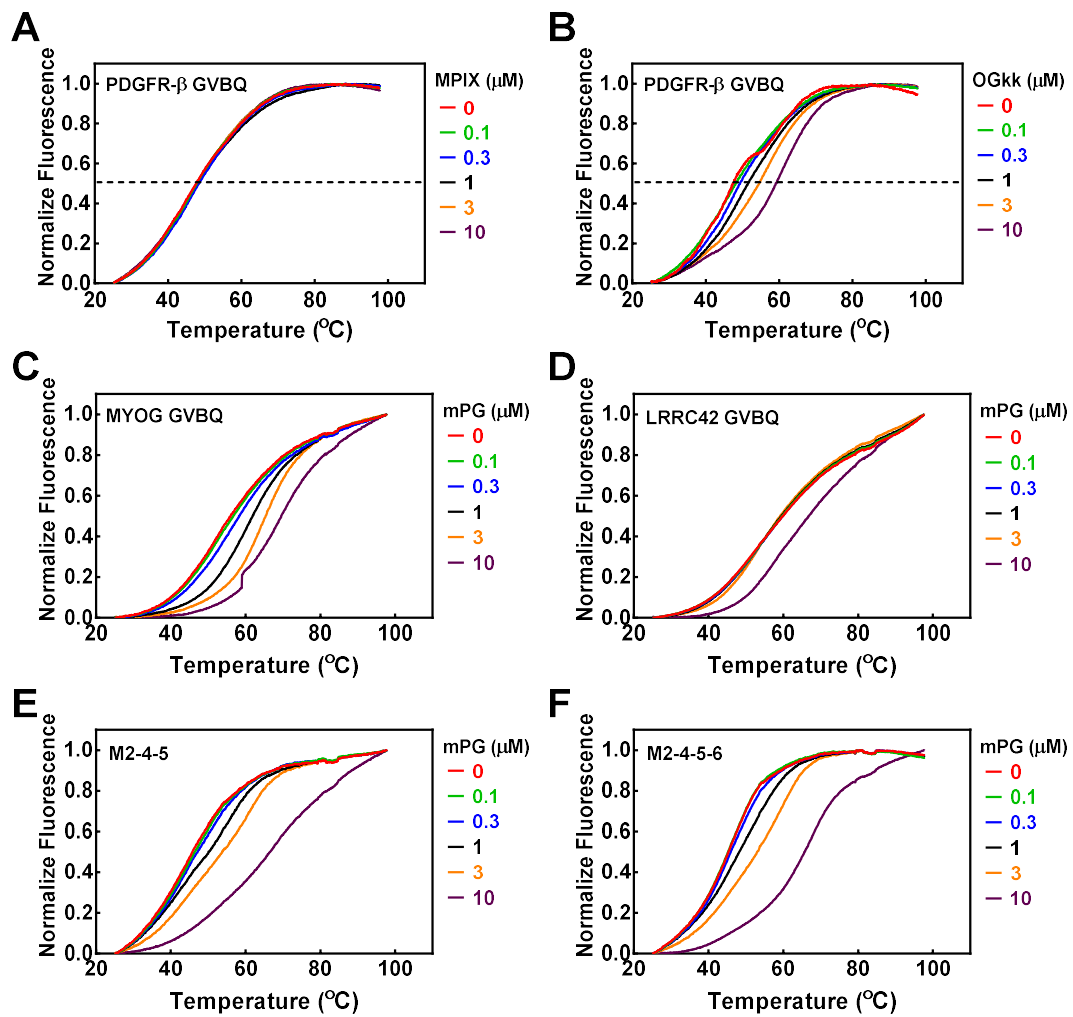

**Figure S7.** A-B) Stabilization of PDGFR- $\beta$  GVBQ (M2-3-4-F) by MPIX and OGkk. C-D) Effect of mPG on MYOG and LRRC42 GVBQ. E-F) Effect of mPG on M2-4-5 and M2-4-5-6 G-quadruplex from PDGFR- $\beta$  promoter.



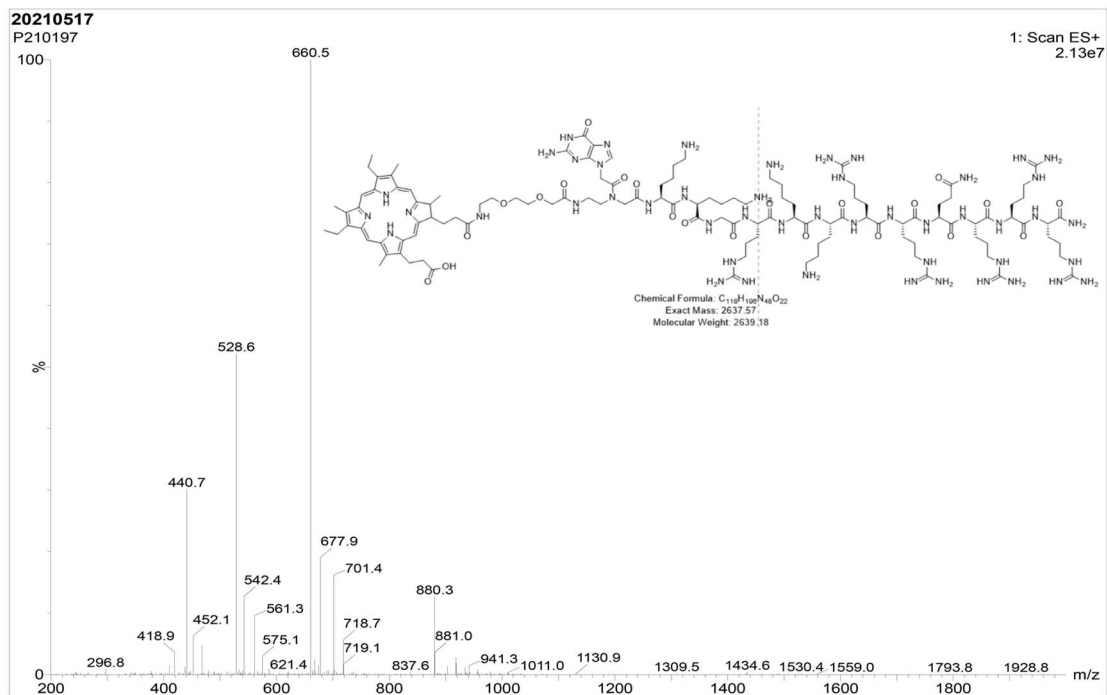

**Figure S8.** ESI mass spectra of mPG-(L-GRKKRRQRRR) (mPG-TAT).

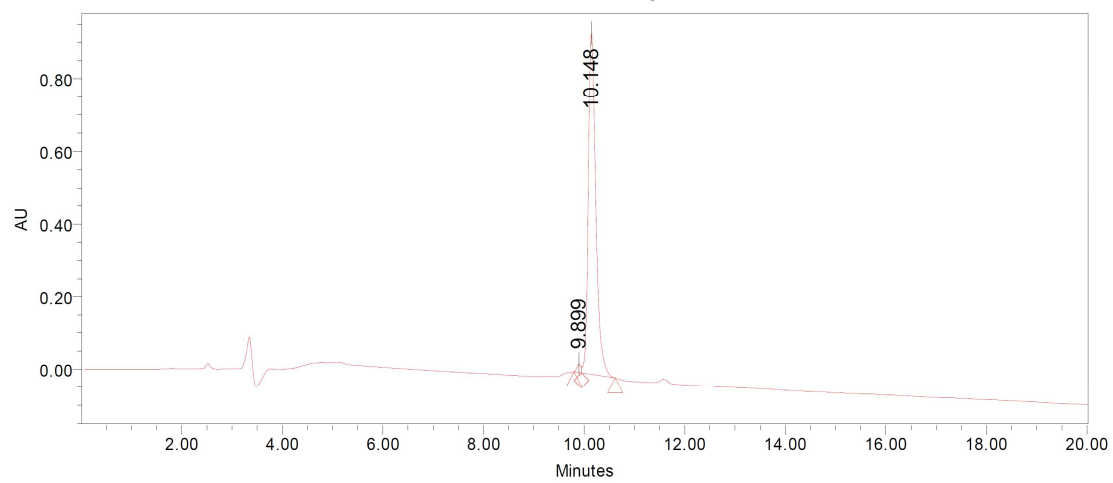

**Figure S9.** HPLC characterization of synthesized mPG-TAT.

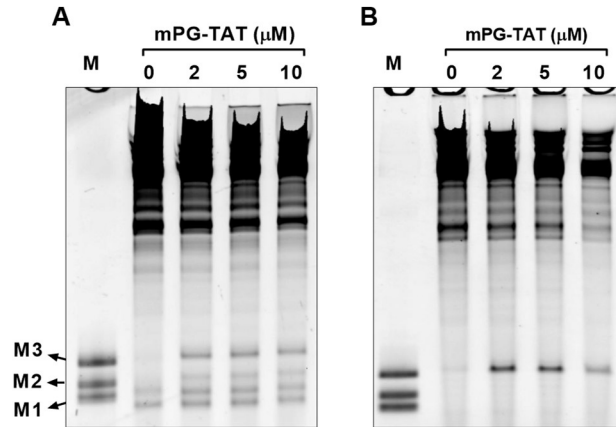

**Figure S10.** Detecting the effect of mPG-TAT on the stability of PDGFR- $\beta$  GVBQ in transcribed plasmids by RNA polymerase arrest. A) Effect of mPG-TAT on the stability of GVBQ in the WT plasmid. B) Effect of mPG-TAT on the stability of GVBQ in the mutant M3A plasmid. Marker (M) shows termination sites as labeled in Figure 3.

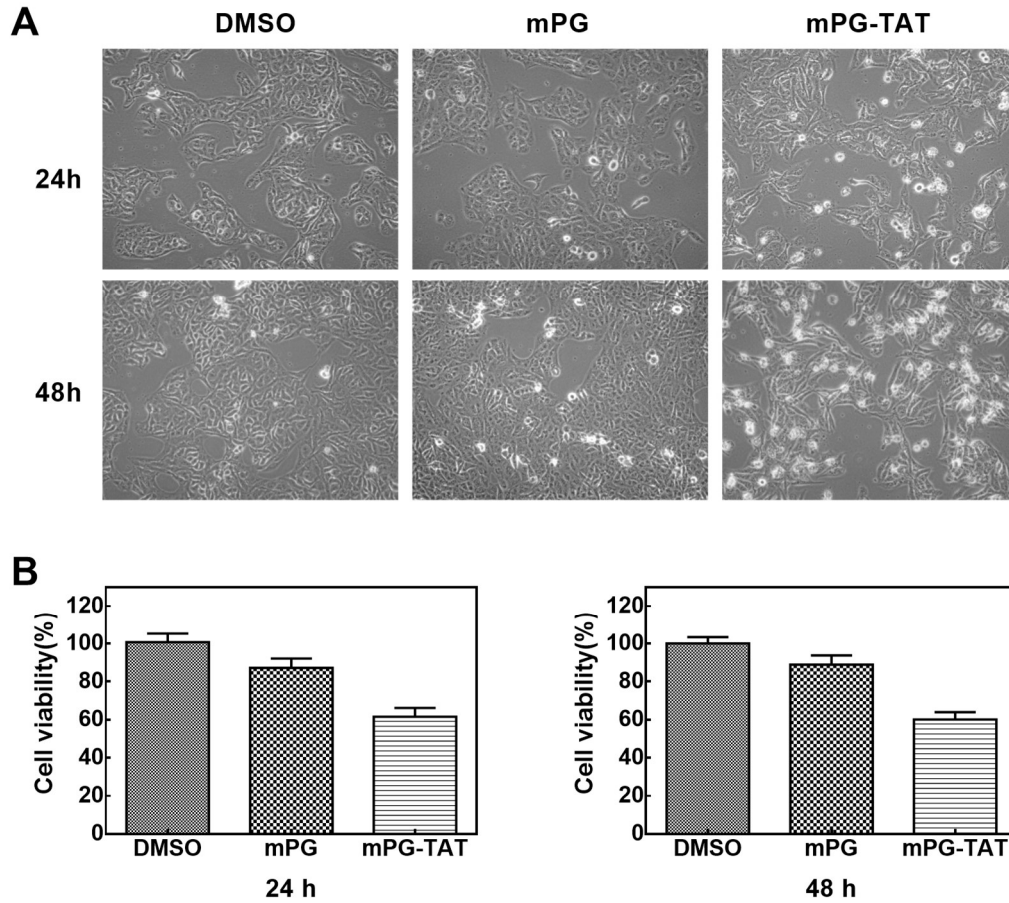

**Figure S11.** Effects of mPG and mPG-TAT on the growth of U2OS cells. A) Images of cells were captured when cells were cultured in the presence of 10  $\mu$ M mPG or 10  $\mu$ M mPG-TAT for 24 h and 48 h. B) Cell viability with 10  $\mu$ M mPG and 10  $\mu$ M mPG-TAT in MTT assay.

**Table S1.** Oligonucleotides used in this study.

| <b>Names</b> | <b>Sequences (5'-3')</b>                                         |
|--------------|------------------------------------------------------------------|
| WT           | CTGATTGGCCCAGCTGGGAGAAGGGGGGGCGGCAGGGG<br>CAGGGAGGGTGGACGCGTGCCT |
| M2A          | CTGATTGGCCCAGCTGGGAGAAGGGGGGGCGGCAGGGG<br>CAGAGAGAGTGGACGCGTGCCT |
| M3A          | CTGATTGGCCCAGCTGAGAGAAGGGGGGGCGGCAGGGG<br>CAGAGAGAGTGGACGCGTGCCT |
| M2-3-4-F     | AGGGGGGGCGGCAGGGG                                                |
| M2-3-4-T     | TTGGGGGGCGGCAGGGGTTT                                             |
| M2-4-5       | TTGGGGGGCAACGGGGCAGGGT                                           |
| M2-4-5-6     | TTGGGCAACGGGGCAGGGAGGGT                                          |
| MYOG         | AGGGTGGGCTGGGAGGT                                                |
| ABTB2        | TGGGCGGAGGGAAGTGGGA                                              |
| LRRC42       | CGGGCCGCGGGAGGAGGGA                                              |
| KRAS         | AGGGCGGTGTGGGAAGAGGGAAGAGGGGGAGG                                 |
| MYC          | AGGGTGGGGAGGGTGGGGA                                              |
| CSTB         | GGGGCGGGGCGCGGGGCGGGG                                            |
| HP1          | TCAGCTGCGCAGTACAGATCTGTACTGCGCAGCTGA                             |
| HP2          | TCAGCTGCGCGCAGCGATTGCGTTTTTCGCTGCGCGCAG<br>CTGA                  |
| TEL-C        | CCCTAACCCTAACCCTAACCCT                                           |
| BCL-C        | CCCGCCCCCTCCTCCCGCGCCC                                           |
| ssDNA        | CCAGCCTGCGGCGAGTG                                                |

**Table S2.** qPCR primers used in this study.

| <b>Names</b>      | <b>Sequences (5'-3')</b> |
|-------------------|--------------------------|
| PDGFR- $\beta$ -F | GAGAAGCAAGCCCTTATGTCG    |
| PDGFR- $\beta$ -R | CGTAGCGGCAGTACTCAGTGAT   |
| GAPDH-F           | GGAGCGAGATCCCTCCAAAAT    |
| GAPDH-R           | GGCTGTTGTCATACTTCTCATGG  |
| MYC-F             | GTCAAGAGGGCGAACACACAAC   |
| MYC-R             | TTGGACGGACAGGATGTATGC    |
| Hif1a-F           | TGCACAGGCCACATTACG       |
| Hif1a-R           | GTTCAAAATCAGCACCAAGC     |
| VEGFA-F           | AGGGCAGAATCATCACGAAGTG   |
| VEGFA-R           | AGGGTCTCGATTGGATGGCA     |
| BCL2-F            | GGTGGGGTCATGTGTGTGG      |
| BCL2-R            | CGGTCAGGTACTCAGTCATCC    |
| KRAS-F            | GAGTACAGTGCAATGAGGGACC   |
| KRAS-R            | TCCTGAGCCTGTTTTGTGTCTAC  |
| BRCA1-F           | GAAACCGTGCCAAAAGACTTC    |
| BRCA1-R           | CCCACTGCAATAAGTTGCCTTA   |
| MYB-F             | GAGGTGGCATAACCACTTGAA    |
| MYB-R             | AGGCAGTAGCTTTGCGATTTC    |
| ERBB2-F           | TGCAGGGAAACCTGGA ACTC    |
| ERBB2-R           | ACAGGGGTGGTATTGTTTCAGC   |
